# Supplementary material for: Pairing 1D/2D-conjugation donors/acceptors towards high-performance organic solar cells
Source: Royal Society of Chemistry journal article supplement (doi:10.1039/c8qm00512e), 2018-12-11
Supplement: c8qm00512e1.pdf [file c8qm00512e1.pdf]

Electronic Supplementary Information for:

**Pairing 1D/2D-conjugation donors/acceptors towards high-performance organic solar cells**

Jiayu Wang,<sup>‡a</sup> Yiqun Xiao,<sup>‡b</sup> Wei Wang,<sup>a</sup> Cenqi Yan,<sup>a</sup> Jeromy Rech,<sup>c</sup> Mingyu Zhang,<sup>a</sup> Wei You,<sup>c</sup> Xinhui Lu<sup>\*b</sup> and Xiaowei Zhan<sup>\*</sup>

<sup>a</sup> Department of Materials Science and Engineering, College of Engineering, Key Laboratory of Polymer Chemistry and Physics of Ministry of Education, Peking University, Beijing 100871, China. E-mail: xwzhan@pku.edu.cn

<sup>b</sup> Department of Physics, Chinese University of Hong Kong, New Territories 999077, Hong Kong, China. E-mail: xhlu@phy.cuhk.edu.hk

<sup>c</sup> University of North Carolina at Chapel Hill, Chapel Hill, North Carolina 27599-3290, United States

<sup>‡</sup> Contributed equally to this work.

## Materials

FTAZ,<sup>S1</sup> ITIC1,<sup>S2</sup> and ITIC2<sup>S2</sup> were synthesized according to our reported procedures. J71 was purchased from Solarmer Inc.

## Characterization

Solution (chloroform) and thin film (on quartz substrate) UV-vis absorption spectra were recorded on a JASCO V-570 spectrophotometer. Electrochemical measurements were carried out under nitrogen on a deoxygenated solution of tetra-*n*-butylammonium hexafluorophosphate (0.1 M) in CH<sub>3</sub>CN using a computer-controlled CHI660C electrochemical workstation, a glassy-carbon working electrode coated with samples, a platinum-wire auxiliary electrode, and an Ag/AgCl as a reference electrode. Potentials were referenced to ferrocenium/ferrocene (FeCp<sub>2</sub><sup>+0</sup>) couple by using ferrocene as an external standard. The thickness of active layer was measured on a Bruker DektakXT profilometer. Steady-state photoluminescence (PL) were measured on FLS980 (Edinburgh Instruments Ltd). Transmission electron microscopy (TEM) measurements were performed on a JEM-2100 transmission electron microscope operated at 200 kV.

GIWAXS measurements were carried out with a Xeuss 2.0 SAXS/WAXS laboratory beamline using a Cu X-ray source (8.05 keV, 1.54 Å) and a Pilatus3R 300K detector. The incidence angle is 0.2°. GISAXS was conducted at 19U2 SAXS beamline at Shanghai Synchrotron Radiation Facility, Shanghai, China, using the 0.15° incident angle with 10 keV primary beam.

## **Fabrication and characterization of organic solar cells**

Organic solar cells were fabricated with the structure: ITO/ZnO/active layer/MoO<sub>x</sub>/Ag. The indium tin oxide (ITO) glass (sheet resistance =  $10 \Omega \square^{-1}$ ) was pre-cleaned in an ultrasonic bath of acetone and isopropanol. A ZnO layer (*ca.* 30 nm) was spin-coated onto the ITO glass from ZnO precursor solution (100 mg Zn(CH<sub>3</sub>COO)<sub>2</sub>·2H<sub>2</sub>O and 0.02 mL ethanolamine dissolved in 1 mL 2-methoxyethanol), and baked at 200 °C for 30 min. A chloroform solution of donor:acceptor (11.5 mg mL<sup>-1</sup> in total) was spin-coated on ZnO layer to form a photoactive layer (*ca.* 100 nm). The devices were optimized according to our previous work.<sup>S2, S3</sup> The MoO<sub>3</sub> layer (*ca.* 5 nm) and Ag (*ca.* 70 nm) were successively evaporated onto the surface of the photoactive layer under vacuum (*ca.* 10<sup>-5</sup> Pa). The active area of the device was 4 mm<sup>2</sup>. The *J-V* curve was measured using a computer-controlled B2912A Precision Source/Measure Unit (Agilent Technologies). An XES-70S1 (SAN-EI Electric Co., Ltd.) solar simulator (AAA grade, 70 × 70 mm<sup>2</sup> photobeam size) coupled with AM 1.5G solar spectrum filters was used as the light source, and the optical power at the sample was 100 mW cm<sup>-2</sup>. A 2 × 2 cm<sup>2</sup> monocrystalline silicon reference cell (SRC-1000-TC-QZ) was purchased from VLSI Standards Inc. The EQE spectra were measured using a Solar Cell Spectral Response Measurement System QE-R3011 (Enlitech Co., Ltd.). The light intensity at each wavelength was calibrated using a standard single crystal Si photovoltaic cell.

## **Mobility measurements**

Hole-only and electron-only diodes were fabricated using the architectures: ITO/PEDOT:

PSS/active layer/Au for holes and Al/active layer/Al for electrons. Mobilities were extracted by fitting the current density-voltage ( $J$ - $V$ ) curves using space-charge-limited current (SCLC) method. The  $J$ - $V$  curves of the devices were plotted as  $\ln(Jd^3/V^2)$  versus  $(V/d)^{0.5}$  using the equation  $\ln(Jd^3/V^2) \cong 0.89(1/E_0)^{0.5}(V/d)^{0.5} + \ln(9\epsilon_0\epsilon_r\mu/8)$ , where  $J$  is the current density,  $d$  is the film thickness of active layer,  $\mu$  is the hole or electron mobility,  $\epsilon_r$  is the relative dielectric constant of the transport medium,  $\epsilon_0$  is the permittivity of free space ( $8.85 \times 10^{-12}$  F m $^{-1}$ ),  $V = V_{\text{appl}} - V_{\text{bi}}$ , where  $V_{\text{appl}}$  is the applied voltage to the device, and  $V_{\text{bi}}$  is the built-in voltage due to the difference in work function of the two electrodes (for hole-only diodes,  $V_{\text{bi}}$  is 0.2 V; for electron-only diodes,  $V_{\text{bi}}$  is 0 V).

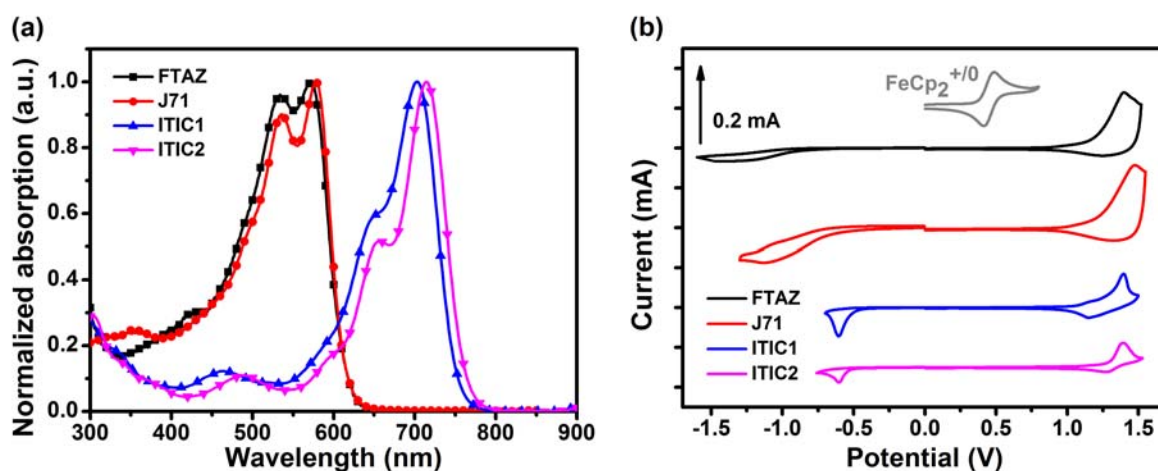

**Fig. S1** (a) UV-vis absorption spectra of FTAZ, J71, ITIC1, and ITIC2 in chloroform solution.

(b) Cyclic voltammograms for FTAZ, J71, ITIC1, and ITIC2 in CH<sub>3</sub>CN/0.1 M [tBu<sub>4</sub>N]<sup>+</sup>[PF<sub>6</sub>]<sup>-</sup> at 100 mV s<sup>-1</sup>, and the horizontal scale refers to an Ag/AgCl electrode.

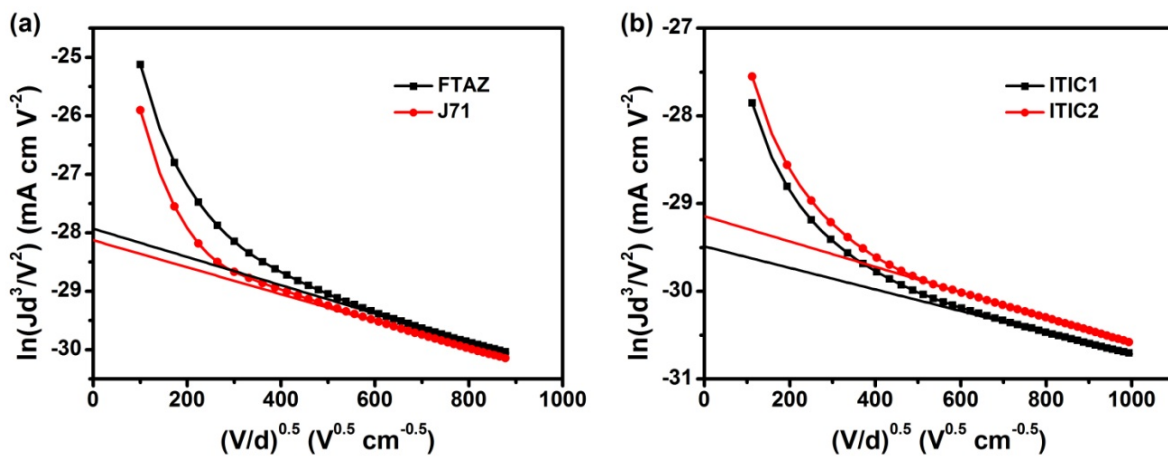

**Fig. S2**  $J$ - $V$  characteristics in dark for (a) hole-only devices based on FTAZ and J71; (b) electron-only devices based on ITIC1 and ITIC2.

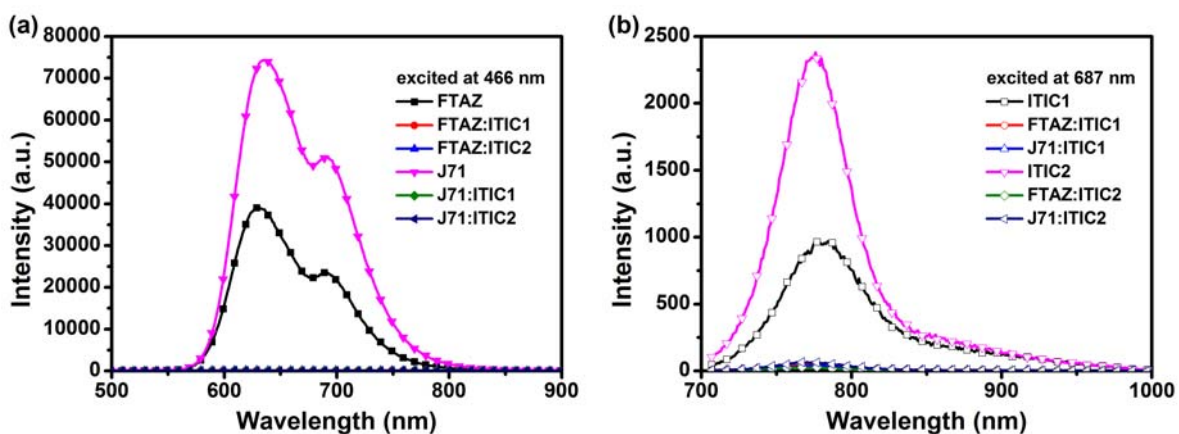

**Fig. S3** PL spectra of (a) FTAZ, J71, and four blended films with same thickness (excited at 466 nm); (b) ITIC1, ITIC2, and four blended films with same thickness (excited at 687 nm).

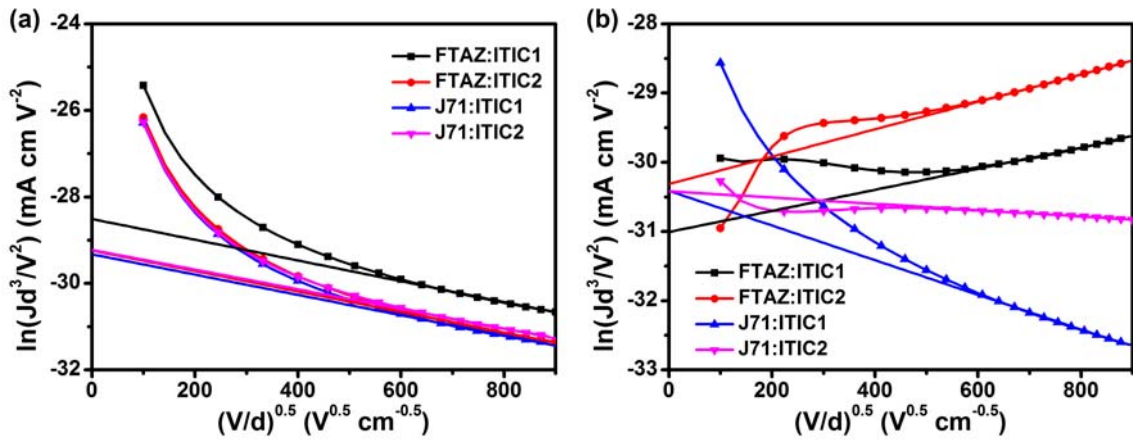

**Fig. S4**  $J$ - $V$  characteristics in dark for (a) hole-only and (b) electron-only devices.

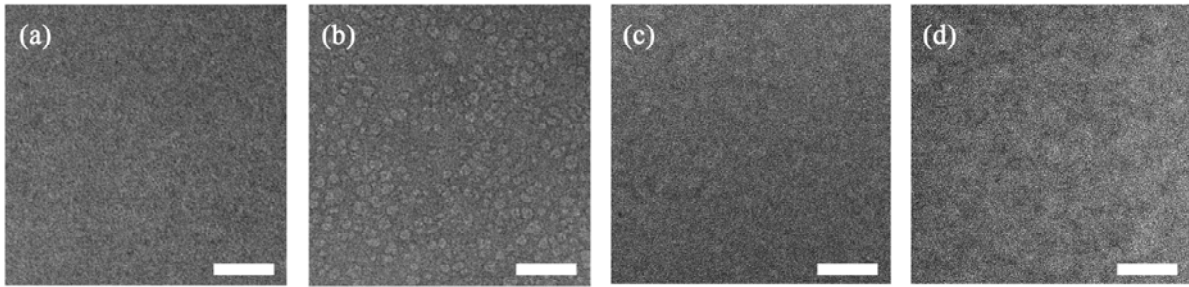

**Fig. S5** TEM images of (a) FTAZ:ITIC1, (b) FTAZ:ITIC2, (c) J71:ITIC1, and (d) J71:ITIC2.

Scale bar: 200 nm.

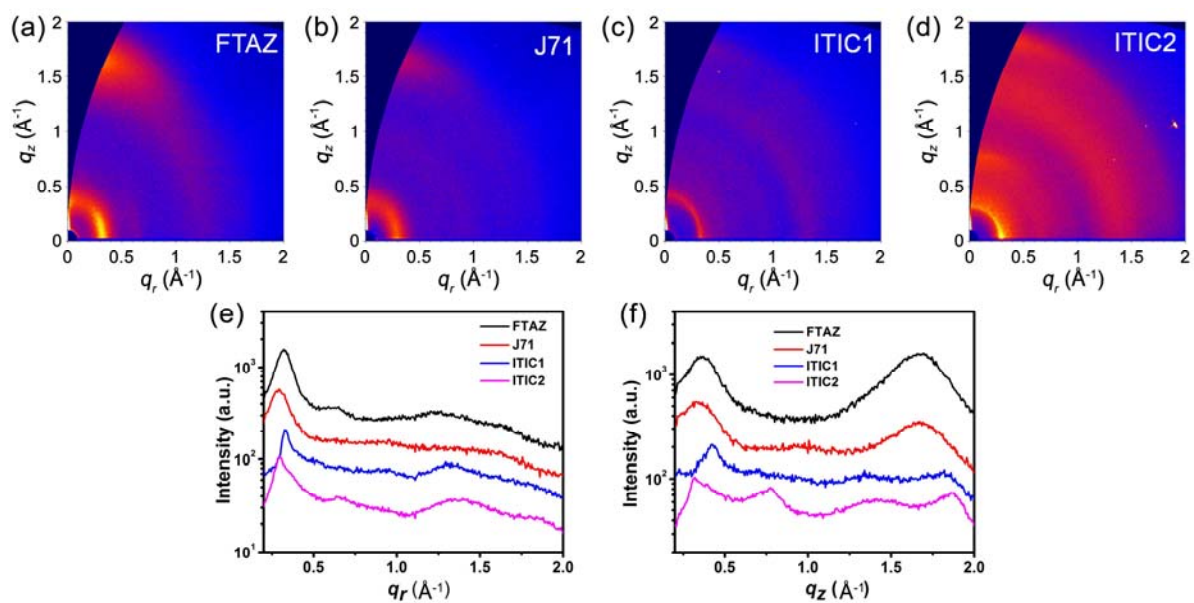

**Fig. S6** (a-d) 2D GIWAXS patterns of FTAZ, J71, ITIC1, and ITIC2 neat films. The corresponding intensity profiles along the (e) in-plane and (f) out-of-plane directions.

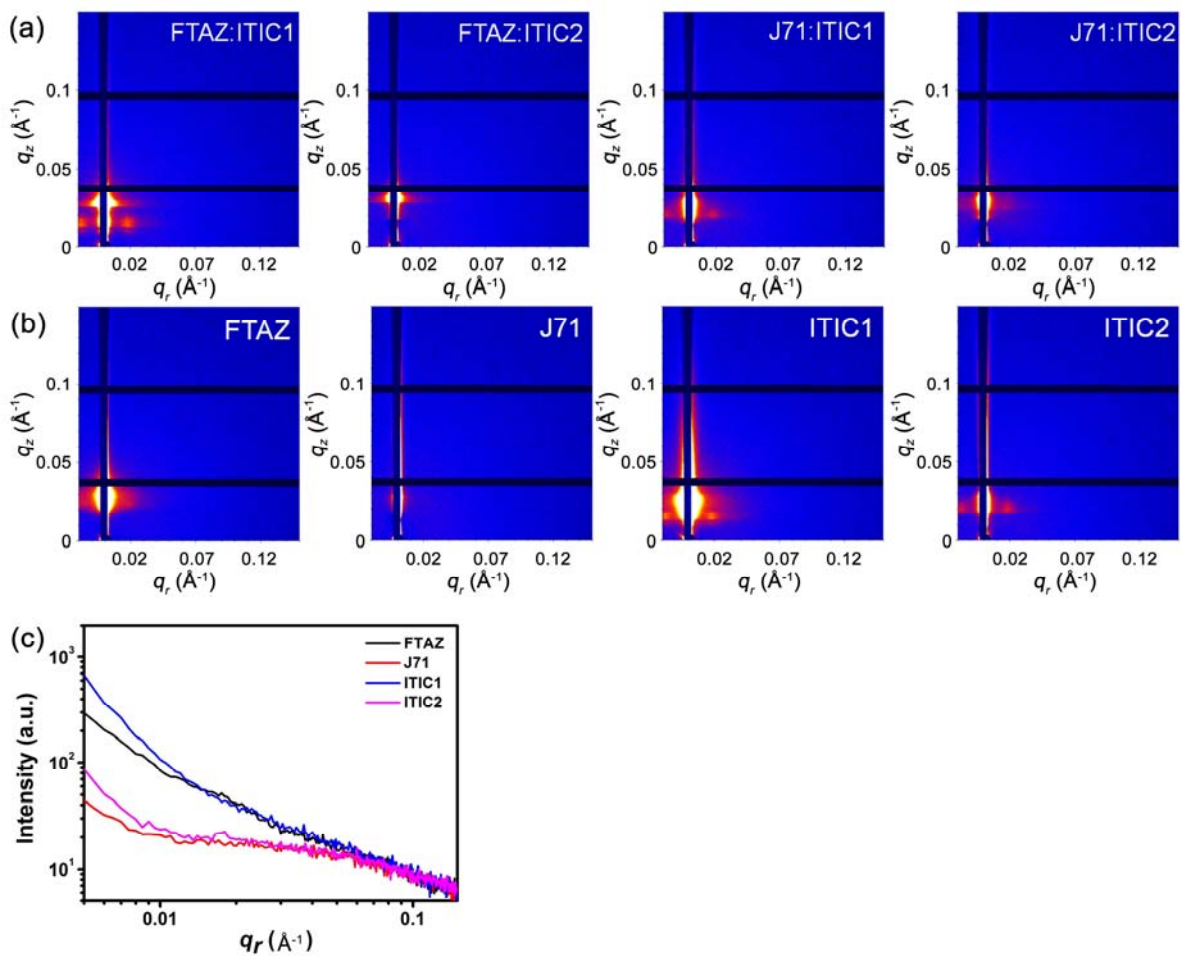

**Fig. S7** 2D GISAXS patterns of (a) the blend films and (b) the pure donors and acceptors. (c) the corresponding intensity profile of the pure donors and acceptors along the in-plane directions.



## References

S1 S. C. Price, A. C. Stuart, L. Yang, H. Zhou and W. You, *J. Am. Chem. Soc.*, 2011, **133**, 4625-4631.

S2 J. Wang, W. Wang, X. Wang, Y. Wu, Q. Zhang, C. Yan, W. Ma, W. You and X. Zhan, *Adv. Mater.*, 2017, **29**, 1702125.

S3 C. Yan, W. Wang, T.-K. Lau, K. Li, J. Wang, K. Liu, X. Lu and X. Zhan, *J. Mater. Chem. A*, 2018, **6**, 16638-16644.
